# Supplementary material for: Loss of HOXB3 correlates with the development of hormone receptor negative breast cancer
Source: PeerJ. 2020 Nov 20;8:e10421. doi: 10.7717/peerj.10421 (PMC7682434; doi:10.7717/peerj.10421)
Supplement: Supplemental Information 6 [file peerj-08-10421-s006.xlsx]

## Sheet: Sheet1
breast cancer cell lines	GAPDH			Average	HOXB3			Average	（HOXB3-GAPDH）	2^detaCT		（HOXB3-GAPDH）	2^detaCT		（HOXB3-GAPDH）	2^detaCT
MCF-10A	12.18	12.24	12.36	12.26	28.22	28.4388	28.2721	28.3103	15.96	1.56878e-05	1	16.1788	1.34799e-05	0.859264	16.0121	1.51314e-05	0.964537
T47D	11.52	11.64	11.27	11.4767	28.3967	28.0367	28.2556	28.2296	16.92	8.06441e-06	0.514057	16.56	1.03501e-05	0.659754	16.7789	8.8929e-06	0.566868
MCF-7	10.99	11.28	11.68	11.3167	28.3117	28.6764	28.5111	28.4997	16.995	7.65563e-06	0.488	17.3597	5.94567e-06	0.379	17.1945	6.6673e-06	0.425
MDA-MB-231	11.4	11.07	11.2	11.2233	29.3	28.9556	29.0733	29.1096	18.0767	3.61727e-06	0.230579	17.7323	4.59256e-06	0.292748	17.85	4.23267e-06	0.269807
SUM-159	11.2	10.93	11.91	11.3467	28.8008	29.531	29.813	29.3816	17.4541	5.56916e-06	0.355	18.1843	3.35718e-06	0.214	18.4664	2.76105e-06	0.176
breast cancer tissues	GAPDH			Average	HOXB3			Average	（HOXB3-GAPDH）	2^detaCT		（HOXB3-GAPDH）	2^detaCT		（HOXB3-GAPDH）	2^detaCT
Normal1	11.31	11.56	11.78	11.55	27.88	28.12	26.69	27.5633	16.33	1.21389e-05	1.58193e-05	16.57	1.02786e-05	2.2835e-05	15.14	2.76953e-05	2.61563e-05
Normal2	10.98	12.1	11.55	11.5433	28.23	26.35	27.12	27.2333	16.6867	9.4801e-06		14.8067	3.48939e-05		15.5767	2.04624e-05
Normal3	12.31	12.05	12.77	12.3767	27.66	27.54	27.38	27.5267	15.2833	2.5076e-05		15.1633	2.7251e-05		15.0033	3.04471e-05
Normal4	12.1	12.28	12.22	12.2	28.08	27.89	27.43	27.8	15.88	1.65823e-05		15.69	1.89164e-05		15.23	2.60204e-05
Cancer1	11.33	11.9	11.1	11.4433	29.1	28.89	29.23	29.0733	17.6567	4.83965e-06	3.61052e-06	17.4467	5.59796e-06	4.47705e-06	17.7867	4.42262e-06	4.40225e-06
Cancer2	11.54	11.78	11.22	11.5133	29.65	29.34	28.66	29.2167	18.1367	3.46992e-06		17.8267	4.30169e-06		17.1467	6.8919e-06
Cancer3	10.88	11.25	11.76	11.2967	30.01	28.99	29.45	29.4833	18.7133	2.32662e-06		17.6933	4.7182e-06		18.1533	3.43006e-06
Cancer4	11.76	11.39	11.16	11.4367	29.44	29.65	29.85	29.6467	18.0033	3.80589e-06		18.2133	3.29034e-06		18.4133	2.8644e-06
											1			1.44349			1.65344
											0.228235			0.283011			0.278283
