# Supplementary material for: Loss of HOXB3 correlates with the development of hormone receptor negative breast cancer
Source: PeerJ journal article supplement (doi:10.7717/peerj.10421), 2020-11-20

Figure 1C

HOXB3

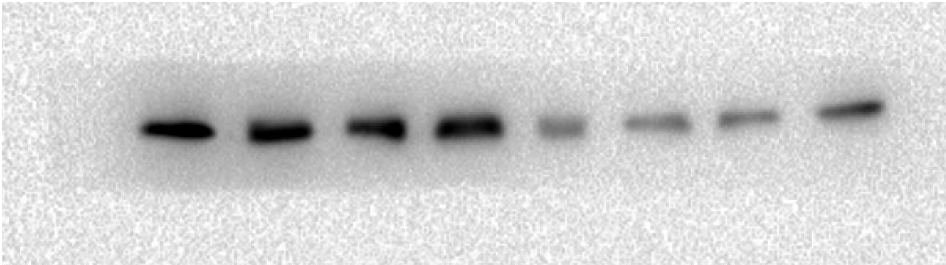

GAPDH

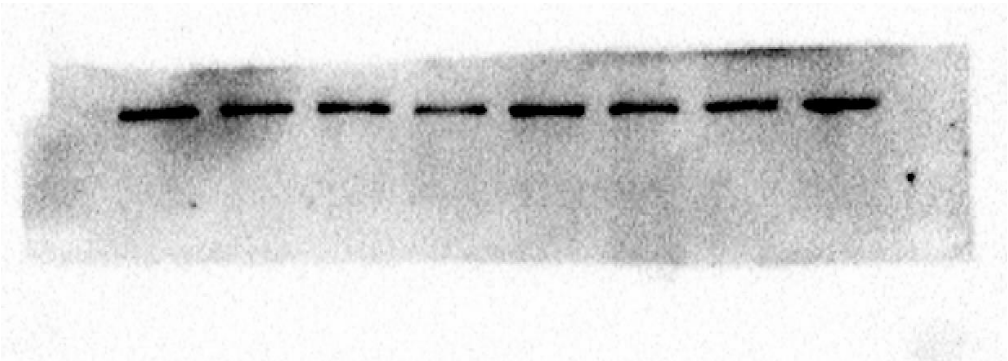

Figure 5C

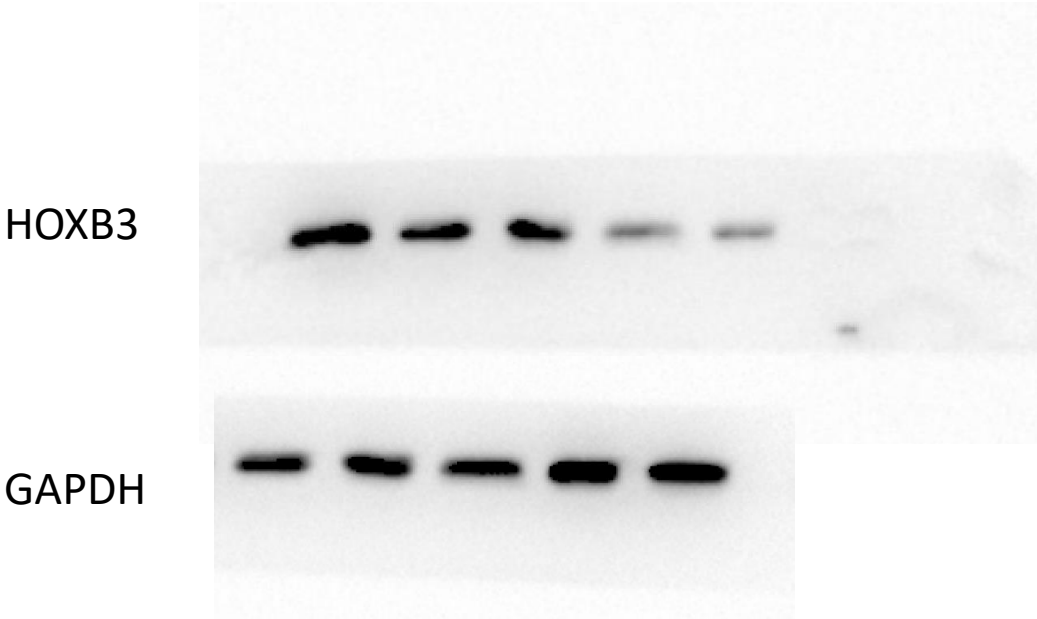

Figure 5D

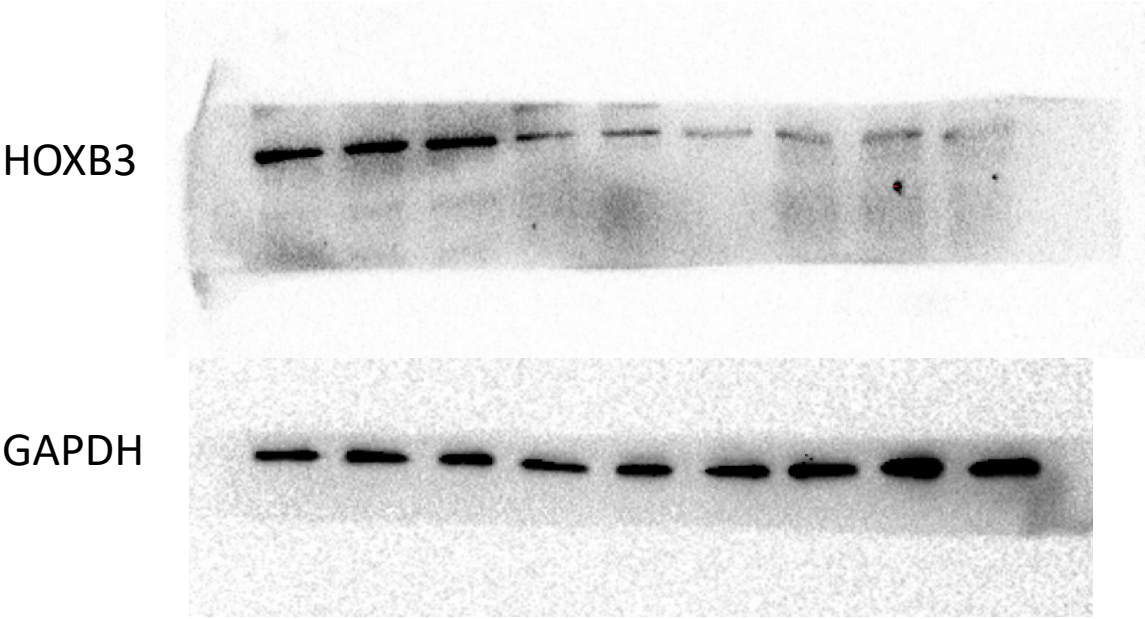

Supplement: western_blot_raw_materials.pdf [file western_blot_raw_materials.pdf]
